# Supplementary material for: Spectroscopic understanding of ultra-high rate performance for LiMn0.75Fe0.25PO4 nanorods–graphene hybrid in lithium ion battery
Source: Royal Society of Chemistry journal article supplement (doi:10.1039/c2cp41012e), 2012-01-01
Supplement: c2cp41012e.pdf [file c2cp41012e.pdf]

## Supplemental Material for

### **Spectroscopy understanding of ultrahigh-rate performance for LiMn<sub>0.75</sub>Fe<sub>0.25</sub>PO<sub>4</sub> nanorods-graphene hybrid in lithium ion battery** Jigang Zhou<sup>a\*</sup>, Jian Wang<sup>a</sup>, Lucia Zuin<sup>a</sup>, Yongfeng Hu<sup>a</sup>, Hailiang Wang<sup>b</sup>, Jason Maley<sup>c</sup>, Ramaswami Sammynauiken<sup>c</sup>, and Hongjie Dai<sup>b</sup>

<sup>a</sup> Canadian Light Source Inc, Saskatoon, Canada. Fax: 1-306-6573535; Tel: 1-306-657-3587; E-mail: jigang.zhou@lightsource.ca; jigan.wang@lightsource.ca

<sup>b</sup> Department of chemistry, Stanford University, Stanford, USA

<sup>c</sup> Saskatchewan Structure Sciences Center, University of Saskatchewan, Canada

#### **1. Preparation of LiMn<sub>0.75</sub>Fe<sub>0.25</sub>PO<sub>4</sub> nanorods-graphene hybrid**

##### **A: Making of Oxidized Graphene Oxide (GO)**

GO was made by a modified Hummers method. Graphite flakes were first grounded with NaCl followed by washing away the NaCl in a vacuum filtration apparatus. The remaining graphite was dried in an oven at 70°C for 30 minutes. The dried solid was stirred with concentrated sulfuric acid at room temperature for 24 hours in a flask. Next, the flask was placed in an oil bath at 40°C and NaNO<sub>3</sub> was added to the suspension and allowed to dissolve for 5 minutes. This step was followed by the slow addition of KMnO<sub>4</sub> with much less amount compared to the original Hummers' method), keeping the reaction temperature below 45°C. The solution was allowed to stir for 30 minutes. Afterwards, water was added to the flask. After 15 minutes, the flask was removed from the oil bath and water and 30% H<sub>2</sub>O<sub>2</sub> were added to end the reaction. This suspension was stirred at room temperature for 5 minutes. The suspension was then repeatedly centrifuged and washed twice with 5% HCl solution and then repeatedly with water. The collected precipitate was dispersed in 100 mL water and bath sonicated for 30 min. After 5000 rpm (3020 g) centrifuge for 5 minutes, a brown homogeneous supernatant was obtained.

##### **B: Synthesis of LiMn<sub>0.75</sub>Fe<sub>0.25</sub>PO<sub>4</sub>/rmGO Hybrid**

GO was transferred from the as-made suspension to pure anhydrous DMF after centrifuge. The concentration of the final mGO DMF suspension was ~0.2mg/ml. In the first step of synthesis, GO DMF suspension was first heated to 80°C in a 30ml vial with magnetic stirring. After the suspension reached 80°C, a mixture of 0.2M Mn(Ac)<sub>2</sub> and 0.2M Fe(NO<sub>3</sub>)<sub>3</sub> aqueous solution (volume ratio 4:1) was injected in. The reaction was kept at 80°C with stirring for 1 hour. After that, the as-made composite was collected by centrifuge. In the second step of synthesis, the as-made composite from the first step of synthesis was dispersed in DMF, to which 1M LiOH, 1M H<sub>3</sub>PO<sub>4</sub>, and 0.5M ascorbic acid DMF solution (volume ratio 1:1:5) were added. The mixture was then sealed in a 40ml Teflon lined stainless steel autoclave for solvothermal reaction at 180°C for 12 hours. A 50:1 DMF/H<sub>2</sub>O mixed solvent was used in order to suppress growth in free solution and restrict the transformation reaction to the surface of mGO sheets. The resulted product was washed with water and then centrifuged at 4000 g for 1 min, which was repeated for 6 times to remove side products such as Li<sub>3</sub>PO<sub>4</sub>.

## 2. TEM of $\text{LiMn}_{0.75}\text{Fe}_{0.25}\text{PO}_4$ nanorods-graphene hybrid

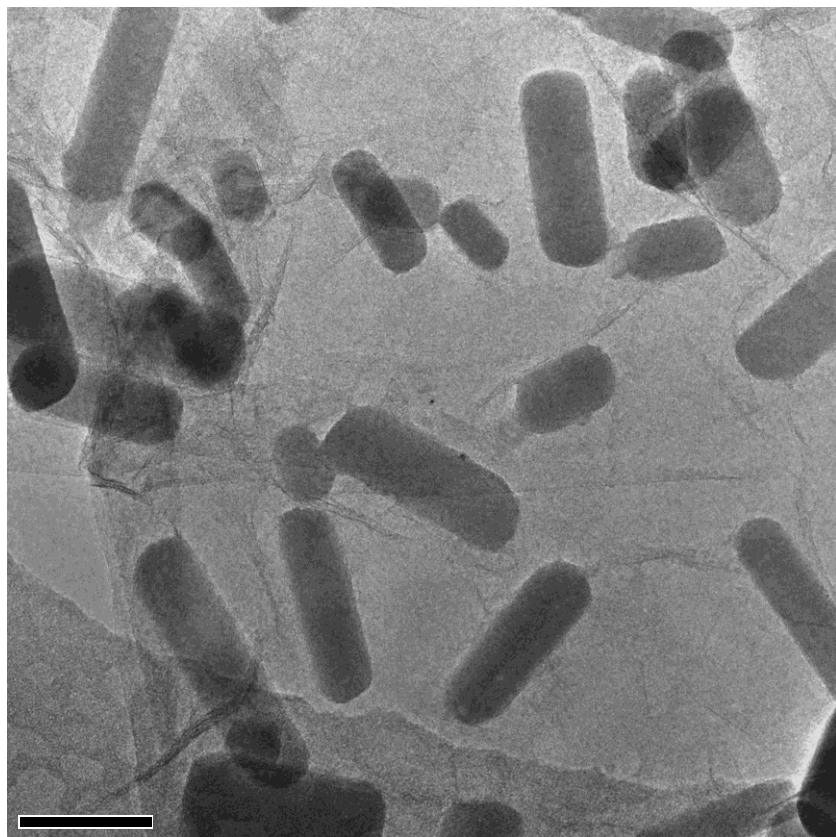

**S1 TEM of  $\text{LiMn}_{0.75}\text{Fe}_{0.25}\text{PO}_4$  nanorods-graphene hybrid**

## 3. Raman and FTIR characterization

Raman spectroscopy measurements were carried out on a Renishaw InVia Reflex Raman microscope using an  $\text{Ar}^+$  laser (Spectra-Physics Model 153-M42-010) operating at 514.5 nm, and a 1800 lines/mm grating. The microscope was focussed onto the sample a 20X N PLAN objective (NA = 0.40), and Raman spectra were obtained using linefocus mode with a 10 s detector exposure time, and 16-64 spectra accumulations. The laser power was 0.35 mW measured at the sample. The instrument calibration was verified using an internal Si sample, which was measured at  $520\text{ cm}^{-1}$ .

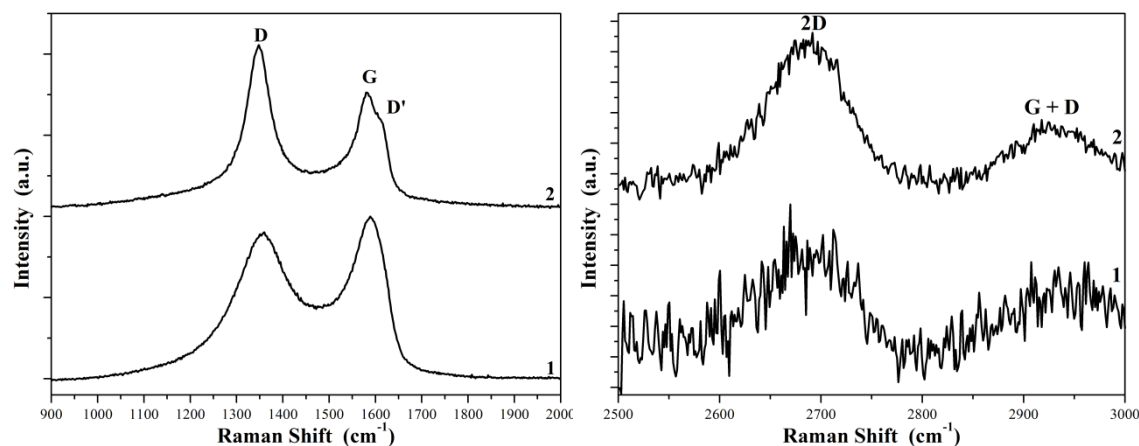

**Figure S2.** Raman spectra of (1) rGO and (2) LMFP-rGO taken with 514.5 nm laser excitation.

Three main peaks are found in the 1200-1700  $\text{cm}^{-1}$  range shown in Figure S2(left). The G band (1580  $\text{cm}^{-1}$ ) is associated with the  $E_{2g}$  phonon mode. The D band (1350  $\text{cm}^{-1}$ ) is associated with disorder induced defects. If sufficient amount of defects are present in the sample, a second defect band called the D' band (1620  $\text{cm}^{-1}$ ) may appear. Curve fitting this region is summarized in Table S1. For rGO, the peak located at 1589  $\text{cm}^{-1}$  corresponds to the coalescence of the G and D' bands, observed when the  $L_D$  (average distance between defects) decreases below approximately 3 nm. [1] On the other hand, the LMFP-rGO sample shows a distinct separation between the G band (1584  $\text{cm}^{-1}$ ) and D' band (1617  $\text{cm}^{-1}$ ) which means a larger  $L_D$ . The large  $L_D$  in LMFP/rGO corresponds to larger intact  $\text{sp}^2$  carbon domain. This is also supported by the much narrow G and D band in LMFP relative to the broad band in rGO. 2D and G+D band also confirms this as shown in S2 (right) where an enhancement of 2D/G+D is visible in LMFP/rGO relative to that in rGO. [2]

[1] Jorio, A. *et al.* Phys. Status Solidi B, 247(11-12), 2980-2982 (2010)

[2] D. Zhan, Z. et al, *Carbon*, 2011, **49**, 1362-1366.

**Table S1.** Peak Fitting Analysis of rGO and LMFP-rGO samples.

| Sample        | Band ( $\text{cm}^{-1}$ ) | Assignment |
|---------------|---------------------------|------------|
| rGO (1)       | 1353 (111)                | D          |
|               | 1589 (72)                 | G + D'     |
|               | 2688 (113)                | 2D         |
|               | 2951 (183)                | G + D      |
| LiFeP-rGO (2) | 1347 (59)                 | D          |
|               | 1584 (60)                 | G          |
|               | 1617 (21)                 | D'         |
|               | 2686 (96)                 | 2D         |
|               | 2937 (128)                | G + D      |

FTIR spectroscopy measurements were carried out on a IlluminatIR II IR microspectrometer (Smiths Detection) mounted on a Renishaw Invia Reflex Raman microscope. The IR beam was focussed onto the sample using either a 15X ARO objective or a 36X diamond ATR objective (Smiths Detection). FTIR spectra were obtained on neat samples, and the spectral resolution was  $4\text{ cm}^{-1}$ .

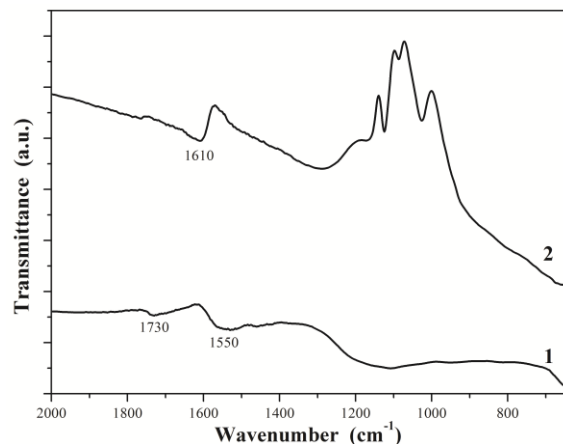

**Figure S3.** FTIR spectra of (1) rGO and (2) LMFP/rGO. Spectra were collected for 512 scans.

The FTIR spectrum for rGO (1) in Figure S3 showed a peak at  $1730\text{ cm}^{-1}$  which can be assigned to the C=O stretching, and indicates that some oxygen containing functional groups are present on the rGO surface. A peak at about  $1550\text{ cm}^{-1}$  is associated with aromatic C=C stretches. For the LMFP/rGO sample shown in Figure S3 (2), a peak at  $1610\text{ cm}^{-1}$  is associated with aromatic C=C stretching, and the peaks in the  $900\text{--}1200\text{ cm}^{-1}$  range are associated with the LMFP coating. No vibration bands associated with oxygen containing functional groups are observed for the LMFP/rGO sample

#### 4. STXM sample preparation

In order to measure spectro-microscopy for individual  $\text{LiMn}_{0.75}\text{Fe}_{0.25}\text{PO}_4/\text{rGO}$  Hybrid. It needs to be first dispersed in methanol with sonication before casting the dispersion onto  $\text{Si}_3\text{N}_4$  window. After solvent was evaporated, the sample was transferred into the STXM chamber for pumping to coarse vacuum ( $\sim 0.25$  torr), then the chamber was filled with  $\sim 1/6$  atm helium for STXM measurement.

#### 5. STXM measurement

STXM measurement was conducted using the STXM at the SM beamline of the Canadian Light Source (CLS). In order to achieve the best spatial resolution, a 25 nm outer-zone zone plate (CXRO, Berkeley Lab) was used. The diffraction-limited spatial resolution for this zone plate is 30 nm. Circularly polarized soft X-ray beam generated from SM elliptically polarized undulator (EPU) was used to remove the linear dichroism effect originated from different orientations of the graphene in the plane of the  $\text{Si}_3\text{N}_4$  window membrane. A 250 l/mm plane grating monochromator (PGM) was used for both C and O K-edges and Mn, Fe L-edges measurements. The incident photon flux ( $I_0$ ) was tuned to be  $\sim 20$  MHz as read by the STXM detector in a hole of the STXM sample plate at 320 eV with exit slits at 35/35  $\mu\text{m}$

(dispersive/non-dispersive) for the C K-edge, and at 560 eV with slits at 25/25  $\mu\text{m}$  for the O K-edge.

## 6. STXM results

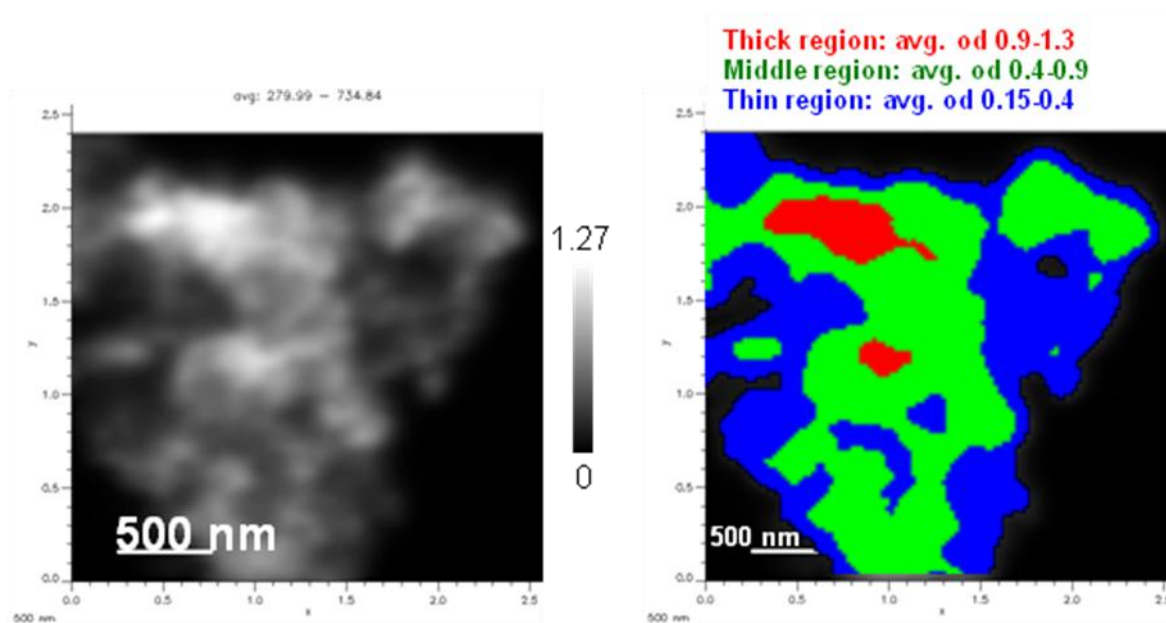

**S4: STXM imaging (left) and thickness mapping (right) of LMFP/rGO**

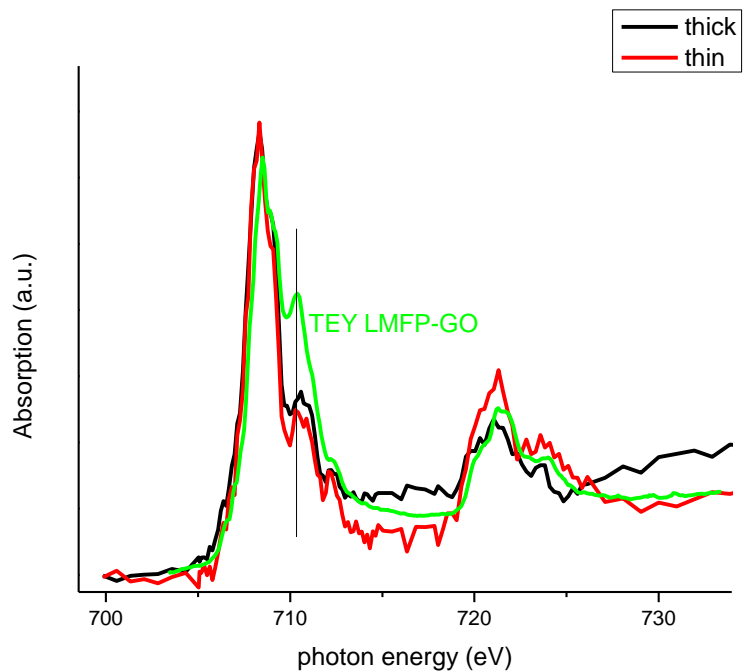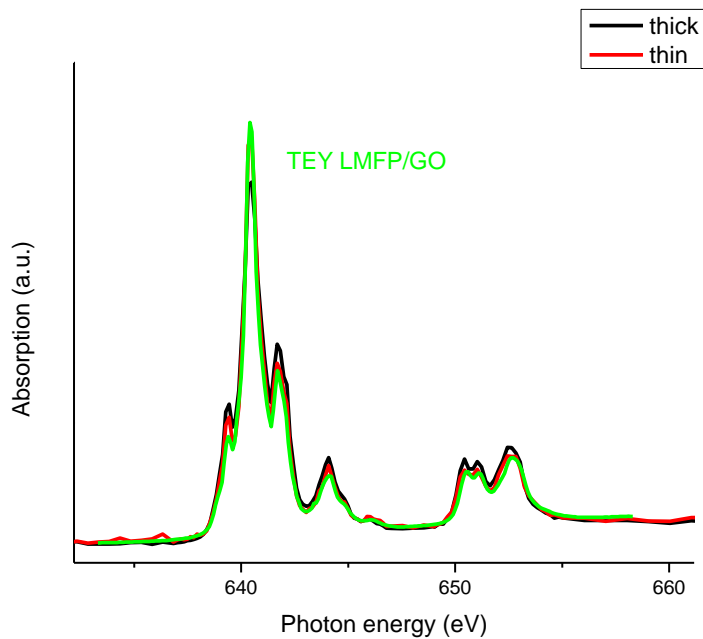

S5 XANES of LMFP/rGO at Fe (top) and Mn (bottom) L-edges extracted from thick (black) and thin (red) region and compared to TEY results (green).

## 6. P K-edge result

P K-edge XANES of LMFP and LMFP/rGO were performed on the Soft X-ray Microcharacterization Beamline (SXRMB,  $\Delta E/E$ :  $\sim 10^{-4}$ ) at the Canadian Light Source (CLS). The apparent broadening in LMFP/rGO relative to LMFP clearly shows the bonding of P-O to graphene in LMFP/rGO.

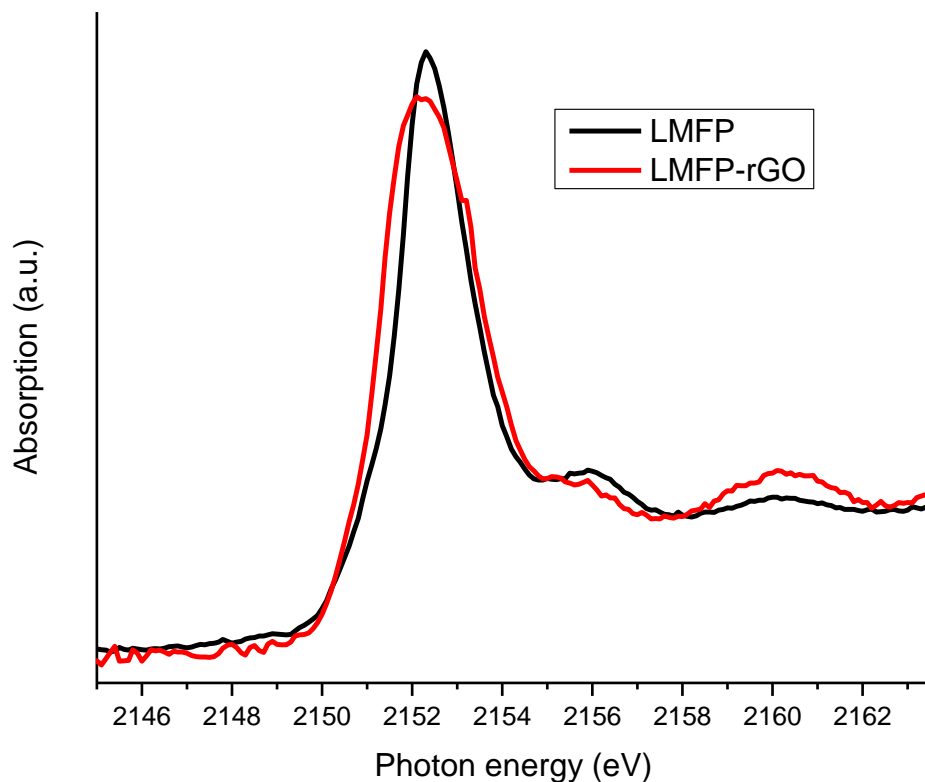

S6: P K-edge XANES of LMFP and LMFP-rGO

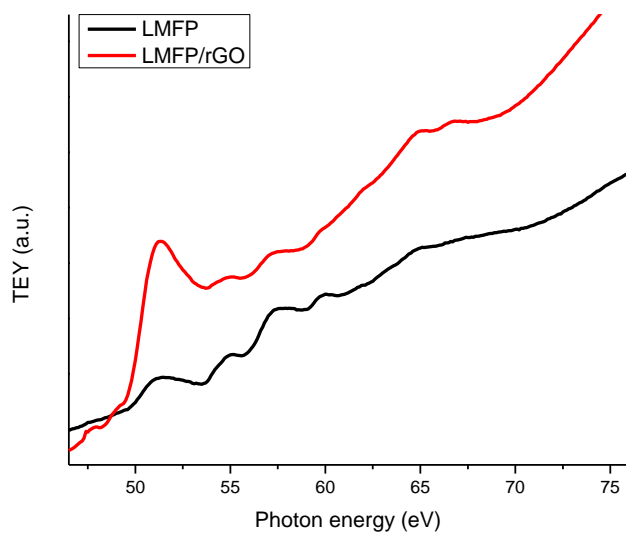

S7: Li K-edge XANES of LMFP and LMFP/rGO recorded at TEY.
